# Supplementary material for: Reduced graphene oxide-gold nanoparticles-catalase-based dual signal amplification strategy in a spatial-resolved ratiometric electrochemiluminescence immunoassay
Source: Royal Society of Chemistry journal article supplement (doi:10.1039/c9an02056j), 2019-11-09
Supplement: c9an02056j1.pdf [file c9an02056j1.pdf]

## **Electronic Supplementary Materials**

### **Reduced graphene oxide-gold nanoparticles-catalase-based dual signal amplification strategy in spatial-resolved ratiometric electrochemiluminescence immunoassay**

Jun-Tao Cao<sup>a,\*</sup>, Xiao-Long Fu<sup>a</sup>, Fu-Rao Liu<sup>a</sup>, Shu-Wei Ren<sup>b</sup>, and Yan-Ming Liu<sup>a,\*</sup>

*<sup>a</sup>College of Chemistry and Chemical Engineering, Institute for Conservation and  
Utilization of Agro-bioresources in Dabie Mountains, Xinyang Normal University,  
Xinyang 464000, China*

*<sup>b</sup>Xinyang Central Hospital, Xinyang 464000, China*

\*Corresponding author: E-mail: liuym9518@sina.com (Y.-M. Liu) and  
jtcao11@163.com (J.-T. Cao), Tel & fax: +86-376-6392889.

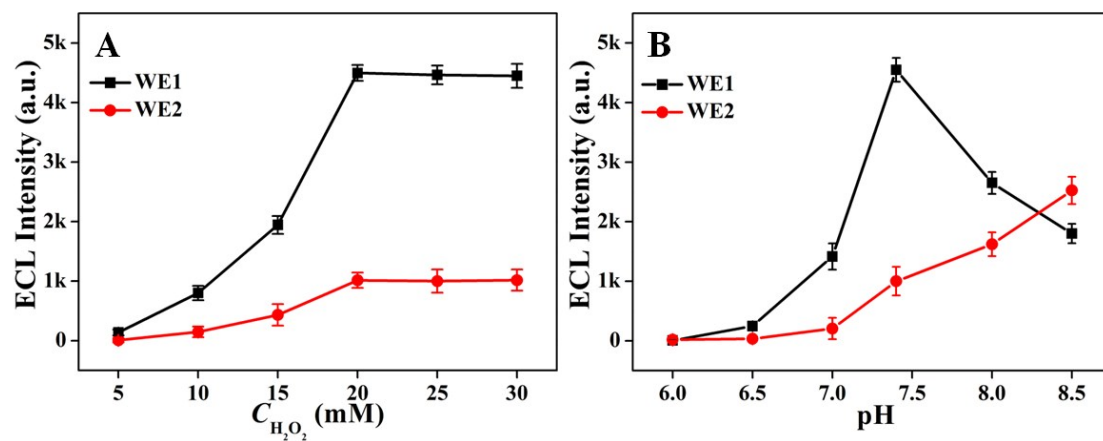

**Fig. S1.** Effects of the concentration of H<sub>2</sub>O<sub>2</sub> (A) and the pH of PBS (B) on the ECL responses.

**Table S1.** Analytical results of cTnI in human serum samples using the proposed method and the reference method.

| Sample No.               | 1     | 2     | 3    | 4    | 5    | 6    |
|--------------------------|-------|-------|------|------|------|------|
| Proposed method (ng/mL)  | 0.009 | 0.011 | 0.49 | 0.12 | 0.73 | 1.69 |
| Reference method (ng/mL) | 0.01  | 0.01  | 0.52 | 0.13 | 0.71 | 1.62 |
| Relative errors (%)      | -10.0 | 10.0  | -5.8 | -7.7 | 2.8  | 4.3  |

**Table S2.** Recovery test for cTnI in spiked human serum samples.

| Sample | Found | Added | Total found | Recoveries | RSDs (%) |
|--------|-------|-------|-------------|------------|----------|
| 1      | 0.01  | 0.01  | 0.02        | 100.0      | 3.6      |
|        |       | 0.10  | 0.10        | 90.0       | 6.7      |
|        |       | 1.00  | 1.04        | 103.0      | 5.4      |
| 2      | 0.52  | 0.10  | 0.63        | 110.0      | 6.6      |
|        |       | 1.00  | 1.45        | 93.0       | 5.9      |
|        |       | 10.0  | 11.35       | 108.3      | 5.6      |
